# Supplementary material for: Asymptomatic and Human-to-Human Transmission of SARS-CoV-2 in a 2-Family Cluster, Xuzhou, China
Source: PubMed Central journal article supplement (PMC7323514; doi:10.3201/eid2607.200718), 2020-07
Supplement: 20-0718-Techapp-s1.pdf [file 20-0718-Techapp-s1.pdf]

Article DOI: <https://doi.org/10.3201/eid2607.200718>

**Appendix**

# Asymptomatic and Human-to-Human Transmission of SARS-CoV-2 in a 2- Family Cluster, Xuzhou, China

**Appendix Table 1.** Summary of clinical features of all cases in the two-family cluster infected with SARS-CoV-2019 before hospitalization.

|                                                           |                                | Index Patient       | Patient 1                 | Patient 2                 | Patient 3                   | Patient 4      | Patient 5 | Patient 6                                |
|-----------------------------------------------------------|--------------------------------|---------------------|---------------------------|---------------------------|-----------------------------|----------------|-----------|------------------------------------------|
| Relationship                                              |                                | Father of P1 and P2 | Daughter of Index Patient | Daughter of Index Patient | Son-in-law of Index Patient | Wardmate of P3 | Son of P4 | Wife of P4                               |
| Age (years)                                               |                                | 56                  | 32                        | 21                        | 42                          | 62             | 34        | 56                                       |
| Sex                                                       |                                | Male                | Female                    | Female                    | Male                        | Male           | Male      | Female                                   |
| Occupation                                                |                                | Farmer              | Teacher                   | Undergraduate student     | Scientific Researcher       | Farmer         | Worker    | Farmer                                   |
| Date of symptom onset                                     |                                | 19/1/2020           | 25/1/2020                 | 24/1/2020                 | 25/1/2020                   | 21/1/2020      | 23/1/2020 | 28/1/2020                                |
| Date of hospital admission                                |                                | 25/1/2020           | 27/1/2020                 | 27/1/2020                 | 27/1/2020                   | 28/1/2020      | 30/1/2020 | 30/1/2020                                |
| Date of case confirmation                                 |                                | 25/1/2020           | 27/1/2020                 | 26/1/2020                 | 27/1/2020                   | 29/1/2020      | 31/1/2020 | 30/1/2020                                |
| Interval between symptom onset and case confirmation      |                                | 7                   | 3                         | 3                         | 3                           | 9              | 9         | 3                                        |
| History of smoking                                        |                                | None                | None                      | None                      | None                        | None           | None      | None                                     |
| History of alcohol drinking                               |                                | None                | None                      | None                      | None                        | None           | None      | None                                     |
| Chronic medical illness                                   |                                | None                | Pregnancy                 | None                      | None                        | Hypertension   | None      | Diabetes, Breast Cancer, Cervical cancer |
| Presenting symptoms and signs before admitted to hospital | Fever                          | +                   | -                         | +                         | +                           | +              | +         | +                                        |
|                                                           | Peak body temperature (°C)     | 39.5                | 37.3                      | 37.5                      | 38                          | 39.2           | 37.5      | 37.3                                     |
|                                                           | Cough                          | -                   | -                         | +                         | -                           | -              | +         | -                                        |
|                                                           | Sputum                         | -                   | -                         | +                         | -                           | -              | +         | +                                        |
|                                                           | Shortness of breath            | -                   | -                         | -                         | -                           | +              | -         | +                                        |
|                                                           | Breath difficulty              | +                   | -                         | -                         | -                           | -              | -         | +                                        |
|                                                           | Sore throat                    | +                   | -                         | -                         | -                           | -              | -         | -                                        |
|                                                           | Headache                       | -                   | -                         | -                         | -                           | -              | -         | -                                        |
|                                                           | Vomit                          | +                   | -                         | -                         | -                           | -              | -         | +                                        |
|                                                           | Diarrhea                       | -                   | -                         | -                         | -                           | -              | -         | +                                        |
|                                                           | Muscular Soreness              | -                   | -                         | -                         | -                           | -              | -         | -                                        |
|                                                           | Fatigue                        | +                   | -                         | -                         | -                           | -              | -         | +                                        |
|                                                           | Oximetry saturation (%)        | 92                  | 99                        | 95                        | 95                          | 99             | 95        | 100                                      |
|                                                           | Respiratory rate (breaths/min) | 23                  | 15                        | 16                        | 22                          | 20             | 18        | 32                                       |
| Blood pressure (mmHg)                                     | 130/70                         | 115/72              | 120/80                    | 120/80                    | 147/87                      | 123/76         | 98/70     |                                          |
| Heart rate (bpm)                                          | 76                             | 72                  | 72                        | 75                        | 123                         | 85             | 60        |                                          |

**Appendix Table 2.** Summary of medical laboratory tests for index patient in the two-family cluster.

| Laboratory Diagnosis                       | Normal Range    | Index Patient |         |         |        |        |
|--------------------------------------------|-----------------|---------------|---------|---------|--------|--------|
|                                            |                 | 29/1/20       | 31/1/20 | 3/2/20  | 8/2/20 |        |
| Routine Blood Test                         | Normal Range    |               |         |         |        |        |
| Leukocytes (10 <sup>9</sup> /L)            | 4.0–10.0        | 4.9           | 10.3    | 5.6     | 7.1    |        |
| Neutrophil Ratio (%)                       | 50.0–70.0       | 86            | 89.5    | 77.9    | 77.1   |        |
| Lymphocyte Ratio (%)                       | 20.0–40.0       | 10.8          | 6.4     | 13.9    | 13     |        |
| Monocyte Ratio (%)                         | 3.0–8.0         | 3.1           | 4       | 8.2     | 9      |        |
| Neutrophil Count (10 <sup>9</sup> /L)      | 2.00–7.00       | 4.23          | 9.23    | 4.39    | 5.47   |        |
| Lymphocyte Count (10 <sup>9</sup> /L)      | 0.80–4.00       | 0.5           | 0.7     | 0.8     | 0.9    |        |
| Monocyte Count (10 <sup>9</sup> /L)        | 0.12–1.20       | 0.15          | 0.41    | 0.46    | 0.64   |        |
| Red blood cell Count (10 <sup>12</sup> /L) | 3.5–5.0         | 4.68          | 4.34    | 4.62    | 4.49   |        |
| Hemoglobin (g/L)                           | 110–150         | 154           | 140     | 148     | 146    |        |
| Hematocrit (%)                             | 37.0–43.0       | 44            | 40.9    | 41.7    | 43.4   |        |
| Platelet Count (10 <sup>9</sup> /L)        | 100–300         | 178           | 262     | 282     | 248    |        |
| Red blood cell Distribution Width (%)      | 11.6–14.0       | 12.1          | 12.4    | 12      | 12.1   |        |
| Mean Platelet volume (fL)                  | 9.4–12.5        | 11.1          | 11.8    | 12      | 10.1   |        |
| Platelet Distribution Width (fL)           | 39.0–46.0       | 16.6          | 13.7    | 14.5    | 16.3   |        |
| Platelet Hematocrit (%)                    | 0.108–0.282     | 0.2           | 0.31    | 0.34    | 0.25   |        |
| Comprehensive Metabolic Panel              | Normal Range    | 26/1/20       | 28/1/20 | 31/1/20 | 3/2/20 | 8/2/20 |
| Alanine Aminotransferase (U/L)             | 0–45            | 23            | 29      | 55      | 27     | 33     |
| Aspartate Aminotransferase (U/L)           | 0–40            | 30            | 36      | 30      | 15     | 19     |
| Alkaline Phosphatase (U/L)                 | 42–128          | 80            | 83      | 68      | 61     | 77     |
| Glutamyltransferase (U/L)                  | 11–50           | 95            | 101     | 89      | 73     | 87     |
| Lactate Dehydrogenase (U/L)                | 0–252           | 334           | 403     | 295     | 229    | 195    |
| Total Bilirubin (umol/L)                   | 0–20            | 9.8           | 14.5    | 11      | 21.6   | 9.9    |
| Albumin (g/L)                              | 34–48           | 41.4          | 41.8    | 33.5    | 34     | 35.6   |
| Glucose (mmol/L)                           | 3.8–6.1         | /             | /       | /       | 5.83   | 6.22   |
| Urea (mmol/L)                              | 1.7–8.3         | 6.1           | 6.4     | 7.2     | 7.1    | 4.5    |
| Creatinine (umol/L)                        | 44–97           | 122           | 112     | 72      | 79     | 76     |
| Uric Acid (umol/L)                         | 208–428         | 373           | 439     | 273     | 264    | 259    |
| Triglyceride (mmol/L)                      | 0–1.70          | 2.25          | /       | 1.66    | 4.22   | 4.93   |
| Total Cholesterol (mmol/L)                 | 2.80–5.20       | 4.19          | /       | 4.06    | 4.34   | 4.71   |
| Calcium (mmol/L)                           | 2.1–2.7         | 2.28          | 2.24    | 2.19    | 2.12   | 2.17   |
| Phosphorus (mmol/L)                        | .097–1.61       | 0.98          | 1.49    | 0.84    | 0.75   | /      |
| Potassium (mmol/l)                         | 3.5–5.3         | 4.61          | 4.27    | 4.63    | 3.89   | 4.24   |
| Sodium (mmol/l)                            | 135–146         | 141           | 135     | 137.2   | 134.2  | 145    |
| Chlorine (mmol/l)                          | 96–108          | 101.4         | 100.2   | 107.1   | 97.3   | 104.4  |
| eGFR (ml/min/1.73m <sup>2</sup> )          | 100–120         | /             | 62.53   | 104.12  | 93.55  | /      |
| Infection Test                             | Normal Range    | 23/1/20       | 28/1/20 | 31/1/20 | 3/2/20 | 8/2/20 |
| Erythrocyte Sedimentation Rate (mm/1h)     | M 0–15/F 0–20   | /             | /       | /       | /      | /      |
| Ferritin (µg/L)                            | M 0–322/F 0–219 | /             | 1253    | 929.65  | 881.9  | /      |
| Procalcitonin (ng/ml)                      | 0–0.1           | /             | 0.08    | 0.04    | 0.04   | 0.06   |
| C-reactive Protein (mg/L)                  | 0.8–8           | 101.4         | /       | 7.9     | 1.6    | 6.4    |
| Coagulation                                | Normal Range    | 26/1/20       | 28/1/20 | 31/1/20 |        | 8/2/20 |
| International Normalized Ratio             | 0.8–1.2         | 1.08          | 1.15    | 1.04    |        | 1      |
| Prothrombin Time (s)                       | 10–14           | 11.7          | 12.4    | 11.2    |        | 10.8   |
| Activated Partial Prothrombin Time (s)     | 21–40           | 36.6          | 36.1    | 30.8    |        | 28.9   |
| Thrombin Time (s)                          | 14.0–21         | 12.6          | 12.8    | 14.7    |        | 14.9   |
| D-dimer (µg/ml)                            | 0–0.5           | 0.14          | 0.13    | 0.37    |        | 0.59   |

**Appendix Table 3.** Summary of medical laboratory tests for patients 1–3 in the two-family cluster.

| Laboratory Diagnosis                       | Normal Range    | Patient 1 |        |         | Patient 2 |         | Patient 3 |        |
|--------------------------------------------|-----------------|-----------|--------|---------|-----------|---------|-----------|--------|
|                                            |                 | 27/1/20   | 3/2/20 | 27/1/20 | 3/2/20    | 27/1/20 | 1/2/20    | 6/2/20 |
| Routine Blood Test                         | Normal Range    | 27/1/20   | 3/2/20 | 27/1/20 | 3/2/20    | 27/1/20 | 1/2/20    | 6/2/20 |
| Leukocytes (10 <sup>9</sup> /L)            | 4.0–10.0        | 3.7       | 3.9    |         | 12.6      | 5.9     | 2.4       | 6.9    |
| Neutrophil Ratio (%)                       | 50.0–70.0       | 72.6      | 66.1   |         | 68.4      | 63.6    | 69.3      | 48.5   |
| Lymphocyte Ratio (%)                       | 20.0–40.0       | 16.5      | 24.2   |         | 26.1      | 21.6    | 28.2      | 38.7   |
| Monocyte Ratio (%)                         | 3.0–8.0         | 10.6      | 8.2    |         | 4.8       | 12.4    | 2.2       | 11.5   |
| Neutrophil Count (10 <sup>9</sup> /L)      | 2.00–7.00       | 2.68      | 2.57   |         | 8.59      | 3.75    | 1.66      | 3.36   |
| Lymphocyte Count (10 <sup>9</sup> /L)      | 0.80–4.00       | 0.6       | 0.9    |         | 3.3       | 1.3     | 0.7       | 2.7    |
| Monocyte Count (10 <sup>9</sup> /L)        | 0.12–1.20       | 0.39      | 0.32   |         | 0.6       | 0.73    | 0.05      | 0.79   |
| Red blood cell Count (10 <sup>12</sup> /L) | 3.5–5.0         | 3.23      | 3.02   |         | 5.06      | 4.3     | 4.48      | 4.13   |
| Hemoglobin (g/L)                           | 110–150         | 106       | 98     |         | 141       | 116     | 123       | 112    |
| Hematocrit (%)                             | 37.0–43.0       | 30.2      | 28     |         | 42.2      | 36.1    | 37        | 35.1   |
| Platelet Count (10 <sup>9</sup> /L)        | 100–300         | 142       | 174    |         | 346       | 647     | 499       | 447    |
| Red blood cell Distribution Width (%)      | 11.6–14.0       | 11.9      | 11.6   |         | 11.7      | 13      | 12.4      | 12.6   |
| Mean Platelet volume (fL)                  | 9.4–12.5        | 10.2      | 10.2   |         | 9.3       | 10      | 9.2       | 9.2    |
| Platelet Distribution Width (fL)           | 39.0–46.0       | 10.8      | 10.8   |         | 10.1      | 10.4    | 15.7      | 15.7   |
| Platelet Hematocrit (%)                    | 0.108–0.282     | 0.15      | 0.16   |         | 0.32      | 0.71    | 0.46      | 0.41   |
| Comprehensive Metabolic Panel              | Normal Range    | 27/1/20   | 3/2/20 | 27/1/20 | 3/2/20    | 27/1/20 | 1/2/20    | 6/2/20 |
| Alanine Aminotransferase (U/L)             | 0–45            | 14        | 8      | 25      | 11        | 47      | 36        | 28     |
| Aspartate Aminotransferase (U/L)           | 0–40            | 18        | 13     | 33      | 12        | 30      | 27        | 15     |
| Alkaline Phosphatase (U/L)                 | 42–128          | 71        | 78     | 70      | 63        | 65      | 76        | 46     |
| Glutaryltransferase (U/L)                  | 11–50           | 9         | 8      | 40      | 23        | 41      | 39        | 29     |
| Lactate Dehydrogenase (U/L)                | 0–252           | 111       | 113    | 220     | 162       | 197     | 228       | /      |
| Total Bilirubin (umol/L)                   | 0–20            | 5.9       | 3.3    | 8.8     | 9.5       | 6       | 8.5       | 7.7    |
| Albumin (g/L)                              | 34–48           | 35.7      | 30.9   | 49.1    | 43.7      | 40.1    | 43.7      | 30.4   |
| Glucose (mmol/L)                           | 3.8–6.1         | /         | 4.44   | /       | 4.06      | /       | /         | /      |
| Urea (mmol/L)                              | 1.7–8.3         | 2.8       | 2.9    | 3.6     | 2.4       | 3.5     | 3.1       | 5.1    |
| Creatinine (umol/L)                        | 44–97           | 42        | 40     | 60      | 56        | 63      | 63        | 56     |
| Uric Acid (umol/L)                         | 208–428         | 300       | 252    | 487     | 413       | 271     | 253       | 233    |
| Triglyceride (mmol/L)                      | 0–1.70          | 1.82      | 2.87   | 1.17    | 3.44      | 0.87    | 1.08      | 2.92   |
| Total Cholesterol (mmol/L)                 | 2.80–5.20       | 5.14      | 4.61   | 3.41    | 3.66      | 3.63    | 4.96      | 4.2    |
| Calcium (mmol/L)                           | 2.1–2.7         | 2.09      | 1.97   | 2.34    | 2.19      | 2.22    | 2.32      | 2.02   |
| Phosphorus (mmol/L)                        | .097–1.61       | 1.32      | 1.12   | 1.46    | 1.05      | 1.32    | 1.31      | 1.24   |
| Potassium (mmol/l)                         | 3.5–5.3         | 3.58      | 3.41   | 3.75    | 3.76      | 4.81    | 4.99      | 4.44   |
| Sodium (mmol/l)                            | 135–146         | 136.5     | 138    | 139.7   | 138.8     | 134.8   | 133.4     | 138    |
| Chlorine (mmol/l)                          | 96–108          | 103.6     | 105.4  | 103.9   | 102.9     | 98.9    | 96.7      | 102.6  |
| eGFR (ml/min/1.73m <sup>2</sup> )          | 100–120         | /         | >120   | /       | >120      | /       | >120      | >120   |
| Infection Test                             | Normal Range    | 27/1/20   | 3/2/20 | 27/1/20 | 3/2/20    | 27/1/20 | 1/2/20    | 6/2/20 |
| Erythrocyte Sedimentation Rate (mm/1h)     | M 0–15/F 0–20   | /         | 47     | /       | 28        | /       | 50        | 14     |
| Ferritin (µg/L)                            | M 0–322/F 0–219 | /         | 14.16  | /       | 128.2     | /       | /         | /      |
| Procalcitonin (ng/ml)                      | 0–0.1           | 0.04      | 0.06   | 0.05    | 0.03      | 0.06    | 0.04      | /      |
| C-reactive Protein (mg/L)                  | 0.8–8           | 16.3      | /      | /       | /         | 4.4     | 7.1       | 0.8    |
| Coagulation                                | Normal Range    | 27/1/20   | 3/2/20 | 27/1/20 | 3/2/20    | 27/1/20 | 1/2/20    | 6/2/20 |
| International Normalized Ratio             | 0.8–1.2         | 0.99      | 0.94   | 1.08    | 1.01      | 1.23    | 1.12      | 1.1    |
| Prothrombin Time (s)                       | 10–14           | 10.7      | 10.1   | 11.7    | 10.9      | 13.3    | 12.1      | 11.9   |
| Activated Partial Prothrombin Time (s)     | 21–40           | 26.7      | 28.9   | 27.9    | 31.7      | 30.7    | 30.6      | 31.6   |
| Thrombin Time (s)                          | 14.0–21         | 13.1      | 15.4   | 13.2    | 15.1      | 15.1    | 14.6      | 15.3   |
| D-dimer (µg/ml)                            | 0–0.5           | 0.21      | 0.28   | 0.07    | 0.06      | 0.51    | 0.48      | 0.69   |

**Appendix Table 4.** Summary of medical laboratory tests for patients 4–6 in the two-family cluster

| Laboratory Diagnosis                       | Normal Range    | Patient 4 |         |        |        |         | Patient 5 |        | Patient 6 |        |        |
|--------------------------------------------|-----------------|-----------|---------|--------|--------|---------|-----------|--------|-----------|--------|--------|
|                                            |                 | 28/1/20   | 2/2/20  | 4/2/20 | 6/2/20 | 10/2/20 | 30/1/20   | 3/2/20 | 30/1/20   | 3/2/20 | 8/2/20 |
| Routine Blood Test                         |                 |           |         |        |        |         |           |        |           |        |        |
| Leukocytes (10 <sup>9</sup> /L)            | 4.0–10.0        | 8.2       | 15.9    | 17.7   | 14.3   | 5.9     | 4.5       | 4.2    | 2.4       | 4.2    | 3.7    |
| Neutrophil Ratio (%)                       | 50.0–70.0       | 80.5      | 78.6    | 87.9   | 83.6   | 71.1    | 54.1      | 49.9   | 71.4      | 59.8   | 53.5   |
| Lymphocyte Ratio (%)                       | 20.0–40.0       | 7.9       | 14.1    | 7.4    | 10.8   | 22.1    | 36.1      | 40.8   | 26.6      | 32.6   | 35.5   |
| Monocyte Ratio (%)                         | 3.0–8.0         | 11.3      | 6.6     | 4      | 4.7    | 5.2     | 8.6       | 7.2    | 1.7       | 7.4    | 7.8    |
| Neutrophil Count (10 <sup>9</sup> /L)      | 2.00–7.00       | 6.57      | 12.47   | 15.56  | 11.96  | 4.19    | 2.43      | 2.09   | 1.69      | 2.51   | 1.98   |
| Lymphocyte Count (10 <sup>9</sup> /L)      | 0.80–4.00       | 0.7       | 2.2     | 1.3    | 1.5    | 1.3     | 1.6       | 1.7    | 0.6       | 1.4    | 0.29   |
| Monocyte Count (10 <sup>9</sup> /L)        | 0.12–1.20       | 0.92      | 1.05    | 0.71   | 0.67   | 0.31    | 0.38      | 0.3    | 0.04      | 0.31   | 0.12   |
| Red blood cell Count (10 <sup>12</sup> /L) | 3.5–5.0         | 2.26      | 2.61    | 3.39   | 3      | 2.68    | 4.64      | 265    | 3.97      | 4.45   | 4.01   |
| Hemoglobin (g/L)                           | 110–150         | 75        | 86      | 113    | 102    | 90      | 146       | 150    | 124       | 134    | 125    |
| Hematocrit (%)                             | 37.0–43.0       | 21.5      | 25.6    | 33.2   | 29.3   | 25.8    | 40.9      | 43     | 35.6      | 38.8   | 36.3   |
| Platelet Count (10 <sup>9</sup> /L)        | 100–300         | 240       | 365     | 407    | 378    | 313     | 213       | 265    | 136       | 164    | 194    |
| Red blood cell Distribution Width (%)      | 11.6–14.0       | 11.4      | 11.9    | 11.9   | 12.3   | 12.7    | 11.2      | 11.2   | 11.9      | 11.9   | 11.1   |
| Mean Platelet volume (fL)                  | 9.4–12.5        | 8.6       | 8.1     | 7.8    | 8.1    | 7.9     | 7.9       | 7.7    | 8.6       | 9.9    | 8.2    |
| Platelet Distribution Width (fL)           | 39.0–46.0       | 15.7      | 15.5    | 15.5   | 15.7   | 15.5    | 15.7      | 15.7   | 16.2      | 10.9   | 16     |
| Platelet Hematocrit (%)                    | 0.108–0.282     | 0.21      | 0.3     | 0.32   | 0.31   | 0.25    | 0.17      | 0.2    | 0.12      | 0.16   | 0.16   |
| Comprehensive Metabolic Panel              | Normal Range    | 28/1/20   | 2/2/20  | 4/2/20 | 6/2/20 | 10/2/20 | 30/1/20   | 3/2/20 | 30/1/20   | 3/2/20 | 8/2/20 |
| Alanine Aminotransferase (U/L)             | 0–45            | 28        | 24      | /      | 27     | 22      | 45        | 33     | 22        | 24     | 24     |
| Aspartate Aminotransferase (U/L)           | 0–40            | 22        | 14      | /      | 19     | 19      | 30        | 27     | 25        | 27     | 22     |
| Alkaline Phosphatase (U/L)                 | 42–128          | 175       | 99      | /      | 64     | 68      | 56        | 48     | 121       | 111    | 113    |
| Glutamyltransferase (U/L)                  | 11–50           | 123       | 66      | /      | 43     | 38      | 23        | 18     | 33        | 28     | 28     |
| Lactate Dehydrogenase (U/L)                | 0–252           | 129       | 133     | /      | 187    | 144     | 126       | 128    | 163       | 166    | 175    |
| Total Bilirubin (umol/L)                   | 0–20            | 10.3      | 8.7     | /      | 10.7   | 8.3     | 27.6      | 14     | 11.9      | 11     | 3.7    |
| Albumin (g/L)                              | 34–48           | 24.6      | 31.8    | /      | 41.5   | 45.2    | 46.7      | 44     | 43.3      | 45.1   | 36.1   |
| Glucose (mmol/L)                           | 3.8–6.1         | 6.73      | /       | /      | /      | 2.87    | 6.88      | 5.01   | 10.67     | 5.18   | 5.87   |
| Urea (mmol/L)                              | 1.7–8.3         | 4.1       | 4.5     | /      | 8      | 7.2     | 3.7       | 4.6    | 4.6       | 6.3    | 4.2    |
| Creatinine (umol/L)                        | 44–97           | 59        | 55      | /      | 39     | 53      | 60        | 65     | 51        | 54     | 37     |
| Uric Acid (umol/L)                         | 208–428         | 175       | 145     | /      | 156    | 211     | 309       | 246    | 278       | 321    | 102    |
| Triglyceride (mmol/L)                      | 0–1.70          | 0.89      | 1.43    | /      | 2.87   | 0.87    | /         | 2.17   | /         | 3.51   | 6.52   |
| Total Cholesterol (mmol/L)                 | 2.80–5.20       | 2.25      | 2.65    | /      | 2.46   | 2.22    | /         | 3.72   | /         | 5.45   | 4.47   |
| Calcium (mmol/L)                           | 2.1–2.7         | 1.86      | 2.22    | 2.11   | 2.24   | 2.32    | 2.26      | 2.19   | 2.19      | 2.12   | 2.18   |
| Phosphorus (mmol/L)                        | .097–1.61       | /         | /       | 1      | 0.9    | 1.15    | 1.06      | 1.1    | 1         | 1.22   | /      |
| Potassium (mmol/l)                         | 3.5–5.3         | 3.35      | 4.93    | 5.27   | 4.56   | 4.28    | 4.05      | 4.47   | 4.21      | 3.12   | 3.54   |
| Sodium (mmol/l)                            | 135–146         | 131       | 138     | 135    | 132.4  | 138.9   | 138.4     | 139.5  | 140.2     | 141.9  | 148    |
| Chlorine (mmol/l)                          | 96–108          | 90        | 99.2    | 96     | 97.1   | 98.1    | 102.9     | 104    | 107       | 101.2  | 106.9  |
| eGFR (ml/min/1.73m <sup>2</sup> )          | 100–120         | /         | /       | /      | >120   | >120    | >120      | >120   | 115.02    | 107.68 | /      |
| Infection Test                             | Normal Range    | 28/1/20   | 31/1/20 | 4/2/20 | 6/2/20 | 10/2/20 | 30/1/20   | 3/2/20 | 30/1/20   | 3/2/20 | 8/2/20 |
| Erythrocyte Sedimentation Rate (mm/1h)     | M 0–15/F 0–20   | /         | /       | /      | /      | 11      | 8         | /      | 14        | /      | /      |
| Ferritin (µg/L)                            | M 0–322/F 0–219 | /         | 564     | 773.6  | 892.7  | /       | 248.5     | 237    | 339.4     | 490.6  | /      |
| Procalcitonin (ng/ml)                      | 0–0.1           | 0.6       | /       | /      | 0.08   | 0.1     | 0.03      | 0.02   | 0.04      | 0.02   | 0.06   |
| C-reactive Protein (mg/L)                  | 0.8–8           | 174.6     | /       | 17.6   | 7.4    | 4.2     | 0         | 0      | 1.8       | 17     | 3.5    |
| Coagulation                                | Normal Range    | 28/1/20   | 2/2/20  |        | 6/2/20 | 10/2/20 | 30/1/20   | 3/2/20 | 30/1/20   |        | 8/2/20 |
| International Normalized Ratio             | 0.8–1.2         | 1.51      | 1.16    |        | 1.28   | 1.38    | 1.21      | 1.12   | 1.17      |        | 1.03   |
| Prothrombin Time (s)                       | 10–14           | 16.3      | 12.5    |        | 13.8   | 14.9    | 13.1      | 12.1   | 12.6      |        | 11.1   |
| Activated Partial Prothrombin Time (s)     | 21–40           | 26        | 24.6    |        | 26.3   | 29      | 30.2      | 31.7   | 28        |        | 28.3   |
| Thrombin Time (s)                          | 14.0–21         | 15.8      | 16.5    |        | 15.2   | 16.4    | 17.2      | 19     | 17        |        | 16.8   |
| D-dimer (µg/ml)                            | 0–0.5           | 0.76      | 0.84    |        | 1.07   | 0.58    | 0.01      | 0.06   | 0.05      |        | 0.09   |

**Appendix Table 5.** Summary of drug therapy during COVID-19 treatment of the clustered cases. Due to pregnancy, patient 1 did not receive any medication. For an illustration of the drug therapy scheme, please see the visualized timeline below.

| Index Patient              | Dosage and Administration       | Start Date | End Date |
|----------------------------|---------------------------------|------------|----------|
| Lopinavir/Ritonavir        | 400mg/100mg bid po              | 26/1/20    | 3/2/20   |
| Umifenovir                 | 200mg tid po                    | 29/1/20    | 3/2/20   |
| Interferon $\alpha$ -2b    | 5MIU bid aerosolized inhalation | 29/1/20    | 3/2/20   |
| Moxifloxacin hydrochloride | 0.4g qd ivgtt                   | 28/1/20    | 6/2/20   |
| Immunoglobulin             | 20 g/d                          | 28/1/20    | 1/2/20   |
| Methylprednisolon          | 40mg bid ivgtt                  | 28/1/20    | 29/1/20  |
| Methylprednisolon          | 60mg qd ivgtt                   | 30/1/20    | 31/1/20  |
| Methylprednisolon          | 40mg qd ivgtt                   | 31/1/20    | 1/2/20   |
| Methylprednisolon          | 20mg qd ivgtt                   | 31/1/20    | 1/2/20   |
| Patient 2                  | Dosage and Administration       | Start Date | End Date |
| Lopinavir/Ritonavir        | 400mg/100mg bid po              | 31/1/20    | 6/2/20   |
| Umifenovir                 | 200mg tid po                    | 29/1/20    | 6/2/20   |
| Moxifloxacin hydrochloride | 0.4g qd po                      | 27/1/20    | 2/2/20   |
| Ketotifen fumarate         | 1mg qd qn                       | 27/1/20    | 2/2/20   |
| Patient 3                  | Dosage and Administration       | Start Date | End Date |
| Lopinavir/Ritonavir        | 400mg/100mg bid po              | 30/1/20    | 5/2/20   |
| Umifenovir                 | 200mg tid po                    | 29/1/20    | 6/2/20   |
| Interferon $\alpha$ -2b    | 5MIU bid aerosolized inhalation | 31/1/20    | 5/2/20   |
| Moxifloxacin hydrochloride | 0.4g qd po                      | 31/1/20    | 6/2/20   |
| Methylprednisolon          | 40mg bid ivgtt                  | 1/2/20     | 3/2/20   |
| Lianhua Qingwen capsule    | 6g tid                          | 31/1/20    | 12/2/20  |
| Budesonide                 | 1mg qd aerosolized inhalation   | 31/1/20    | 5/2/20   |
| Patient 4                  | Dosage and Administration       | Start Date | End Date |
| Lopinavir/Ritonavir        | 400mg/100mg bid po              | 30/1/20    | 3/2/20   |
| Umifenovir                 | 200mg tid po                    | 29/1/20    | 4/2/20   |
| Interferon $\alpha$ -2b    | 5MIU bid aerosolized inhalation | 30/1/20    | 6/2/20   |
| Biapenem                   | 0.3g q8h ivgtt                  | 29/1/20    | 6/2/20   |
| Linezolid                  | 0.6g q12h ivgtt                 | 5/2/20     | 13/2/20  |
| Patient 5                  | Dosage and Administration       | Start Date | End Date |
| Lopinavir/Ritonavir        | 400mg/100mg bid po              | 30/1/20    | 1/2/20   |
| Umifenovir                 | 200mg tid po                    | 30/1/20    | 6/2/20   |
| Moxifloxacin hydrochloride | 0.4g qd po                      | 30/1/20    | 6/2/20   |
| Patient 6                  | Dosage and Administration       | Start Date | End Date |
| Lopinavir/Ritonavir        | 400mg/100mg bid po              | 30/1/20    | 2/2/20   |
| Umifenovir                 | 200mg tid po                    | 30/1/20    | 6/2/20   |
| Interferon $\alpha$ -2b    | 5MIU bid aerosolized inhalation | 31/1/20    | 6/2/20   |
| Moxifloxacin hydrochloride | 400mg qd po                     | 26/1/20    | 7/2/20   |
| Methylprednisolon          | 40mg bid ivgtt                  | 30/1/20    | 30/1/20  |
| Chinese medicine decoction | 1Package bid po                 | 5/2/20     | 10/2/20  |
| Lianhua Qingwen capsule    | 6000mg tid po                   | 8/2/20     | 10/2/20  |

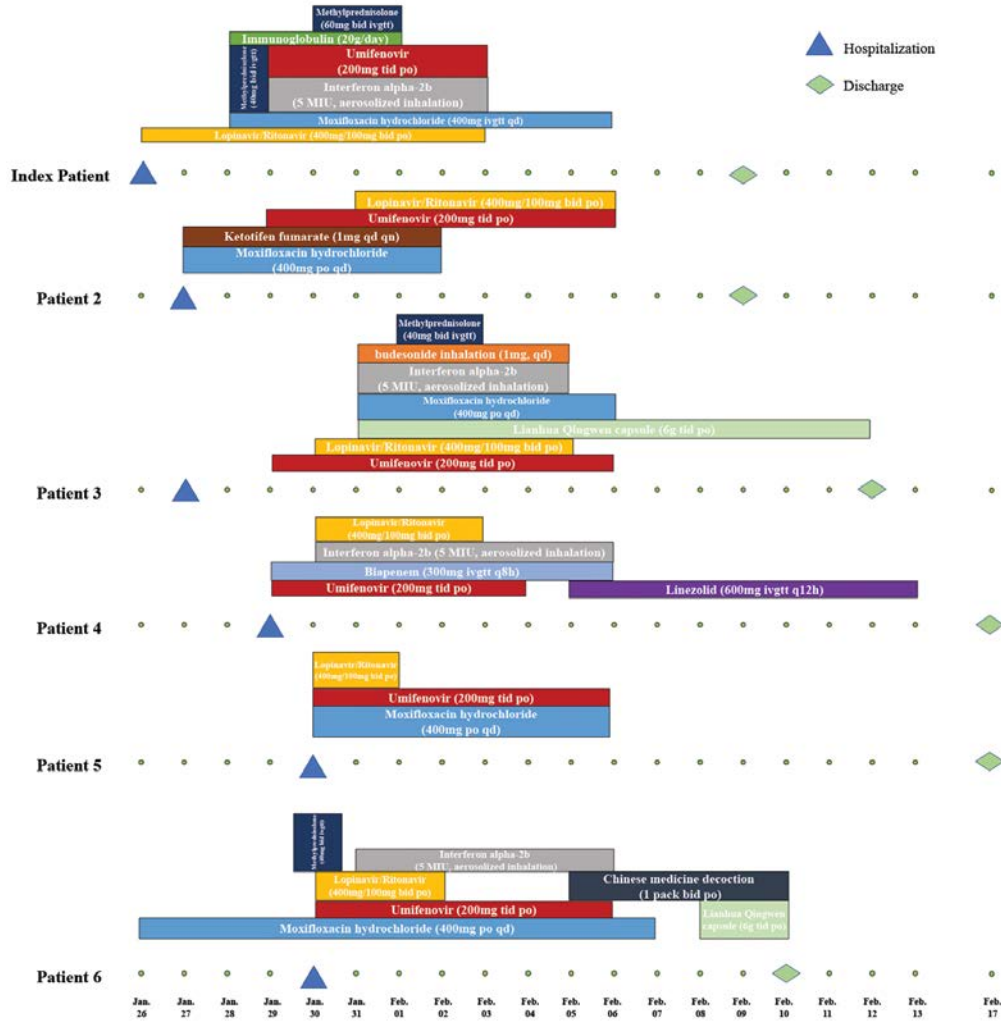

**Appendix Figure 1.** Illustration of the drug therapy scheme for all the patients with SARS-CoV-2 infection in the 2-family cluster.

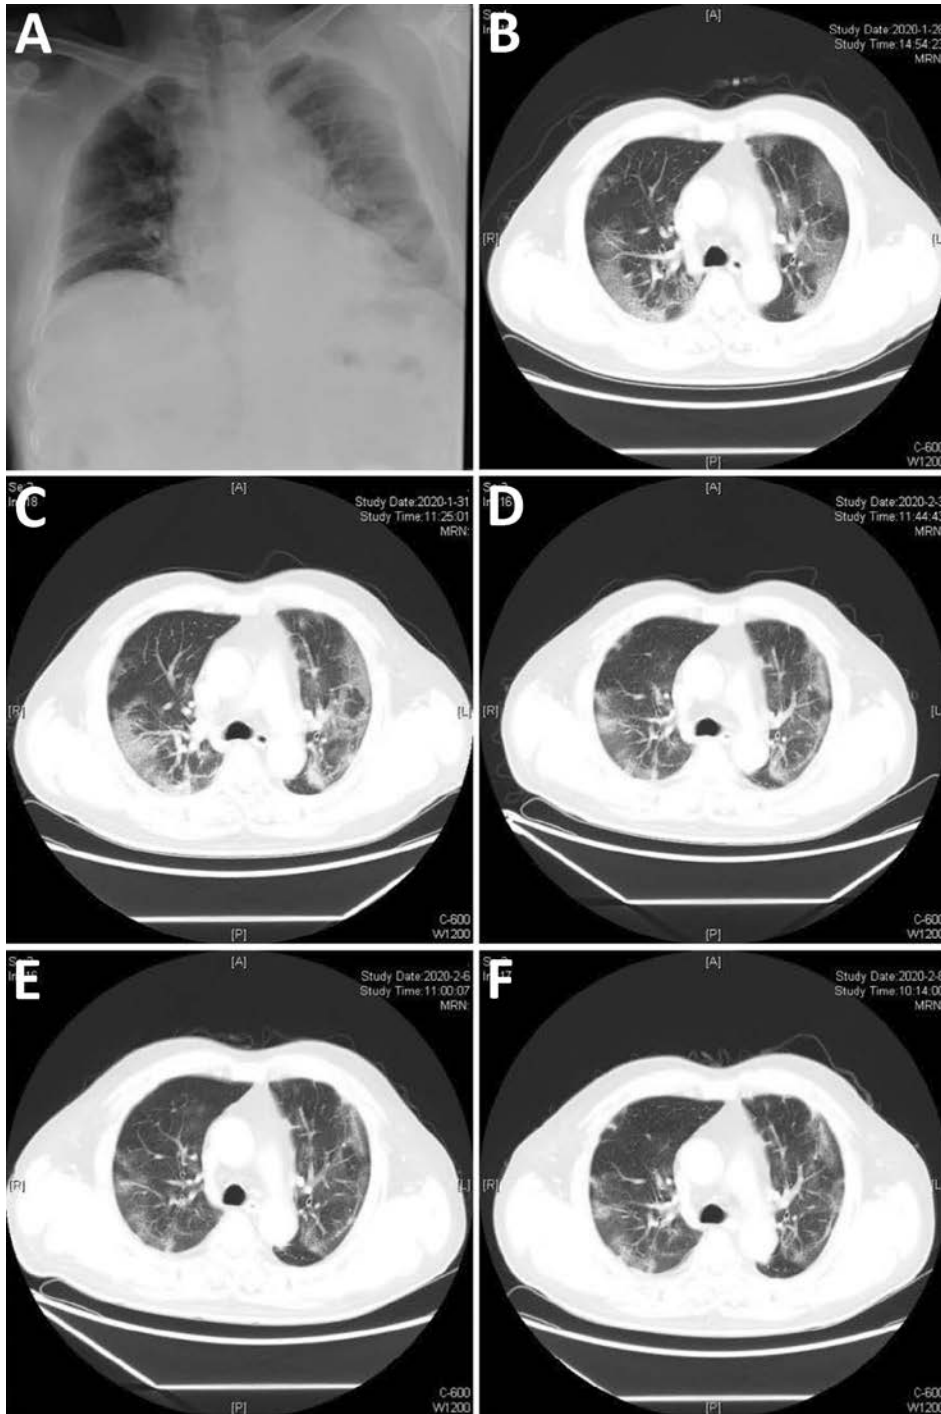

**Appendix Figure 2.** Typical evolution of chest CT findings in the 56-year-old male index patient confirmed positive for SARS-CoV-2 infection. A) Chest radiograph. Bilateral lungs show flocculent high-density shadows while the left lung is more prominent. B–F) Chest CT scanning. B) Multiple ground-glass-like high-density shadows on both lungs with blurred edges and interstitial changes on January 28. C) No significant difference from previous observation on January 31. D) Slightly absorbed shadow in the upper lobe on February 3. E) Some lesions in the lower lobe of both lungs were slightly absorbed on February 6. F) No significant difference from previous observation on February 8. Ground glass white patches are shown in each subgraph due to SARS-CoV-2 infection. With the progression of recovery, gradual reduction of white patches is observed.
